# Supplementary material for: Aromatic primary monoamine-based fast-response and highly specific fluorescent probes for imaging the biological signaling molecule nitric oxide in living cells and organisms
Source: Royal Society of Chemistry journal article supplement (doi:10.1039/c6tb03382b), 2017-01-01
Supplement: c6tb03382b1.pdf [file c6tb03382b1.pdf]

## Supporting Information

Aromatic Primary Monoamine-Based Fast-Response and Highly Specific Fluorescent Probes for Imaging Biological Signaling Molecule Nitric Oxide in Living cells and Organisms

Yingying Huo,<sup>a</sup> Junfeng Miao,<sup>a</sup> Yaping Li,<sup>a</sup> Yawei Shi,<sup>b</sup> Heping Shi,<sup>a</sup> and Wei Guo<sup>a,\*</sup>

<sup>a</sup>*School of Chemistry and Chemical Engineering and* <sup>b</sup>*Institute of Biotechnology, Shanxi University, Taiyuan 030006, China.*

*E-mail: guow@sxu.edu.cn*

## 1. Synthesis of Compounds 1a-e

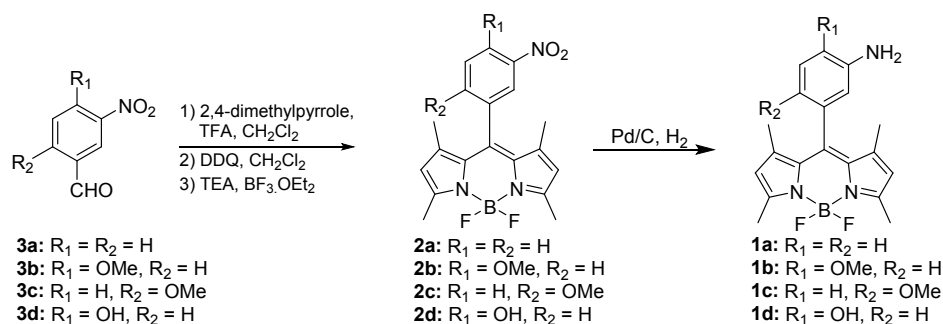

### 1.1 Compound 1a

Compound **3a** (2.00 g, 13.2 mmol), 2,4-dimethylpyrrole (1.84 g, 26.5 mmol) and CH<sub>2</sub>Cl<sub>2</sub> (400 mL) was added to a 1 L reaction flask. The mixture was stirred for 20 min at room temperature under nitrogen. Trifluoroacetic acid (60 μL) was then added and stirred overnight. After TLC monitoring showed complete consumption of the starting material, a solution of DDQ (2,3-dichloro-5,6-dicyano-1,4-benzodiuone) (3.00 g, 13.2 mmol) in 40 ml of CH<sub>2</sub>Cl<sub>2</sub> was added, and stirring was continued for 2 h. The reaction mixture was washed with water, dried over Na<sub>2</sub>SO<sub>4</sub>, filtered and evaporated. The residue and triethylamine (26 mL) were dissolved in 100 mL of anhydrous CH<sub>2</sub>Cl<sub>2</sub>, and the solution was stirred at room temperature for 30 min. BF<sub>3</sub>·OEt<sub>2</sub> (26 mL) was added, and stirring was continued for 10 min. The reaction mixture was washed with water and 2 N NaOH. The aqueous solution was extracted with CH<sub>2</sub>Cl<sub>2</sub>. The combined organic extracts were dried over Na<sub>2</sub>SO<sub>4</sub>, filtered, and evaporated. The crude compound was purified by column chromatography (EtOAc/PE = 1:10) to afford compound **2a** as an orange solid. <sup>1</sup>H NMR (600 MHz, DMSO) δ 8.42 (d, J = 8.3 Hz, 1H), 8.28 (s, 1H), 7.92 (d, J = 7.6 Hz, 1H), 7.87 (t, J = 7.9 Hz, 1H), 6.22 (s, 2H), 2.47 (s, 6H), 1.34 (s, 6H); <sup>13</sup>C NMR (151 MHz, DMSO) δ 156.14, 148.95, 143.04, 139.18, 135.87, 135.43, 131.59, 130.96, 124.71, 123.69, 122.29, 14.91, 14.82.

A mixture of **2a** (500 mg, 1.47 mmol) and 10% Pd-C (100 mg) in 50 mL CH<sub>2</sub>Cl<sub>2</sub> was stirred at room temperature under H<sub>2</sub> for 5 h. The reaction mixture was filtered. The filtrate was evaporated under reduced pressure. The residue was purified by silica gel

flash chromatography (EtOAc/CH<sub>2</sub>Cl<sub>2</sub> = 1:3) to give compound **1a** as an orange solid. Yield: 77%. <sup>1</sup>H NMR (600 MHz, DMSO) δ 7.19 (t, J = 7.8 Hz, 1H), 6.69 (dd, J = 8.1, 1.6 Hz, 1H), 6.47 (d, J = 1.8 Hz, 1H), 6.42 (d, J = 7.4 Hz, 1H), 6.16 (s, 2H), 5.33 (s, 2H), 2.44 (s, 6H), 1.52 (s, 6H); <sup>13</sup>C NMR (151 MHz, DMSO) δ 154.92, 150.16, 143.57, 143.23, 134.91, 131.02, 130.33, 121.57, 114.87, 114.68, 112.84, 14.67, 14.29; ESI-MS: calcd for [M+H<sup>+</sup>] 340.1791, Found 340.1794.

### 1.2 Compound 1b

Compound **2b** was synthesized starting from compound **3b** according to the similar procedure to that of **2a**. Yield: 62%. <sup>1</sup>H NMR (600 MHz, CDCl<sub>3</sub>) δ 7.82 (s, 1H), 7.48 (d, J = 7.9 Hz, 1H), 7.24 (d, J = 8.5 Hz, 1H), 6.02 (s, 2H), 4.05 (s, 3H), 2.56 (s, 6H), 1.46 (s, 6H); <sup>13</sup>C NMR (151 MHz, CDCl<sub>3</sub>) δ 156.47, 153.27, 142.59, 140.04, 137.87, 134.01, 131.45, 127.04, 125.85, 121.78, 114.19, 56.73, 15.04, 14.66.

Compound **1b** was synthesized starting from compound **2b** according to the similar procedure to that of **1a**. Yield: 65%. <sup>1</sup>H NMR (600 MHz, DMSO) δ 6.94 (d, J = 7.8 Hz, 1H), 6.54 (s, 1H), 6.45 (d, J = 7.2 Hz, 1H), 6.16 (s, 2H), 4.97 (s, 2H), 3.83 (s, 3H), 2.44 (s, 6H), 1.51 (s, 6H); <sup>13</sup>C NMR (151 MHz, DMSO) δ 154.73, 147.23, 143.79, 143.26, 139.18, 131.47, 126.63, 121.47, 115.37, 112.88, 111.18, 55.75, 14.66, 14.46; ESI-MS: calcd for [M+H<sup>+</sup>] 370.1897, Found 370.1902.

### 1.3 Compound 1c (also named MA)

Compound **2c** was synthesized starting from compound **3c** according to the similar procedure to that of **2a**. <sup>1</sup>H NMR (600 MHz, DMSO) δ 8.47 (dd, J = 9.2, 2.8 Hz, 1H), 8.15 (d, J = 2.8 Hz, 1H), 7.45 (d, J = 9.3 Hz, 1H), 6.20 (s, 2H), 3.94 (s, 3H), 2.46 (s, 6H), 1.42 (s, 6H); <sup>13</sup>C NMR (151 MHz, DMSO) δ 161.93, 155.80, 142.50, 142.00, 136.13, 130.97, 127.85, 125.75, 123.74, 122.00, 113.09, 14.73, 14.29.

Compound **1c** (also named **MA**) was synthesized starting from compound **2c** according to the similar procedure to that of **1a**. Yield: 72%. <sup>1</sup>H NMR (600 MHz, DMSO) δ 6.91 (d, J = 8.9 Hz, 1H), 6.71 (dd, J = 8.8, 2.8 Hz, 1H), 6.39 (d, J = 2.8 Hz, 1H), 6.14 (s, 2H), 4.84 (s, 2H), 3.62 (s, 3H), 2.43 (s, 6H), 1.52 (s, 6H); <sup>13</sup>C NMR (151

MHz, DMSO)  $\delta$  157.48, 150.02, 146.93, 145.74, 143.49, 134.20, 126.19, 124.19, 119.25, 117.55, 116.56, 59.18, 17.52, 16.73; ESI-MS: calcd for  $[M+H^+]$  370.1897, Found 370.1898.

#### 1.4 Compound 1d

Compound **2d** was synthesized starting from compound **3d** according to the similar procedure to that of **2a**.  $^1\text{H}$  NMR (600 MHz, DMSO)  $\delta$  11.49 (s, 1H), 7.91 (s, 1H), 7.53 (d,  $J = 8.5$  Hz, 1H), 7.30 (d,  $J = 8.5$  Hz, 1H), 6.21 (s, 2H), 2.45 (s, 6H), 1.47 (s, 6H);  $^{13}\text{C}$  NMR (151 MHz, DMSO)  $\delta$  155.75, 152.66, 143.03, 139.75, 138.30, 134.90, 131.41, 125.48, 124.82, 122.08, 120.40, 15.02, 14.71.

Compound **1d** was synthesized starting from compound **2d** according to the similar procedure to that of **1a**.  $^1\text{H}$  NMR (600 MHz, DMSO)  $\delta$  9.20 (s, 1H), 6.77 (d,  $J = 7.7$  Hz, 1H), 6.49 (s, 1H), 6.29 (d,  $J = 7.8$  Hz, 1H), 5.96 (s, 2H), 4.51 (s, 2H), 2.41 (s, 6H), 1.50 (s, 6H);  $^{13}\text{C}$  NMR (151 MHz, DMSO)  $\delta$  154.26, 145.26, 143.88, 143.34, 137.20, 131.68, 125.49, 120.91, 116.43, 115.23, 113.97, 14.51, 14.56; ESI-MS: calcd for  $[M+H^+]$  356.1740, Found 356.1745.

#### 1.5 Compound 1e

Compound **1e** was synthesized according to a reported procedure by us.<sup>1</sup> Yield: 77%.  $^1\text{H}$  NMR (600 MHz, DMSO- $d_6$ )  $\delta$  8.77 (s, 1H), 6.70 (d,  $J = 8.6$  Hz, 1H), 6.57 (dd,  $J_1 = 8.6$ ,  $J_2 = 2.7$  Hz, 1H), 6.30 (d,  $J = 2.6$  Hz, 1H), 6.13 (s, 2H), 4.64 (br, 2H), 2.43 (s, 6H), 1.58 (s, 6H);  $^{13}\text{C}$  NMR (150 MHz, DMSO- $d_6$ )  $\delta$  157.16, 147.65, 145.85, 145.58, 144.30, 134.33, 124.36, 123.98, 120.31, 119.86, 116.96, 17.55, 16.77; ESI-MS: calcd for  $[M+H^+]$  356.1740, Found 356.1745.

#### 1.6 The deamination product dA-1c (also named dA-MA)

A THF solution of **1c** (40 mg, 0.108 mmol) was bubbled NO gas under aerobic conditions at room temperature. The reaction was monitored using TLC to ensure the complete consumption of **1c**. Then the solvent was removed on a rotary evaporator. The residue was dissolved in  $\text{CH}_2\text{Cl}_2$ , and the organic phase washed three times with water, and dried over  $\text{MgSO}_4$ . After the solvent was removed on a rotary evaporator,

**dA-1c** was obtained as a yellow powder. Yield: 95%.  $^1\text{H}$  NMR (600 MHz,  $\text{CDCl}_3$ )  $\delta$  7.44 (s, 1H), 7.13 (s, 1H), 7.08 (d,  $J = 4.6$  Hz, 1H), 6.99 (d,  $J = 6.3$  Hz, 1H), 5.96 (s, 2H), 3.77 (s, 3H), 2.55 (s, 6H), 1.43 (s, 6H);  $^{13}\text{C}$  NMR (151 MHz,  $\text{CDCl}_3$ )  $\delta$  156.43, 154.93, 142.60, 138.96, 131.57, 130.62, 129.54, 123.83, 121.50, 120.85, 111.16, 55.62, 14.59, 13.81; ESI-MS: calcd for  $[\text{M}+\text{H}^+]$  355.1788, Found 355.1785.

### 1.7 Compound NIR-MA

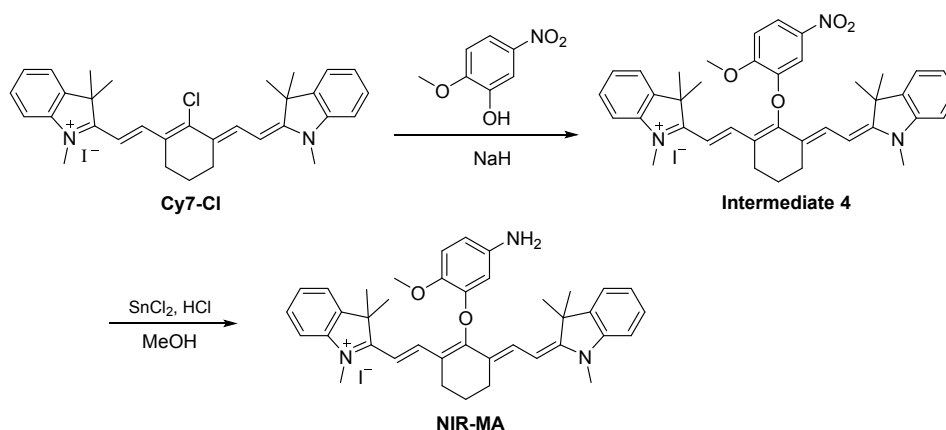

2-methoxy-5-nitrophenol (85 mg, 0.5 mmol) and NaH (60% in mineral oil) (20 mg, 0.5 mmol) were dissolved in anhydrous *N,N*-dimethylformamide (DMF) (15 mL). The mixture was stirred at room temperature for 10 min under an  $\text{N}_2$  atmosphere. Then a solution of **Cy7-Cl** (122 mg, 0.20 mmol) in anhydrous DMF (2 mL) was added to the mixture in via a syringe. The reaction mixture was further stirred for 4 h. The solvent was removed under reduced pressure, then the crude product was purified by silica gel chromatography with  $\text{MeOH}/\text{DCM}=1/50$  to afford intermediate **4** as a dark green solid. Yield: 60%.  $^1\text{H}$  NMR (600 MHz, DMSO)  $\delta$  8.07 (d,  $J = 8.8$  Hz, 1H), 7.70 (d,  $J = 14.4$  Hz, 2H), 7.55 – 7.49 (m, 4H), 7.39 (s, 4H), 7.23 (s, 2H), 6.23 (d,  $J = 14.3$  Hz, 2H), 4.23 (s, 3H), 3.63 (s, 6H), 2.76 (s, 4H), 1.94 (s, 2H), 1.36 – 1.28 (m, 12H);  $^{13}\text{C}$  NMR (151 MHz, DMSO)  $\delta$  172.61, 167.45, 161.60, 154.27, 147.82, 143.23, 141.38, 141.03, 139.91, 132.12, 128.93, 125.42, 122.72, 121.27, 120.21, 113.21, 111.76, 108.70, 101.58, 63.47, 48.96, 30.26, 29.11, 27.37, 23.48. ESI-MS: calcd for  $[\text{M}-\text{I}]^+$  616.3175, Found 616.3174.

To a solution of **4** (82 mg, 0.11 mmol) in MeOH (4 mL) and concentrated HCl (0.6

mL) was added SnCl<sub>2</sub>·H<sub>2</sub>O (500 mg, 2.2 mmol). The solution was stirred at room temperature overnight under an N<sub>2</sub> atmosphere, then neutralized with 2 N NaOH. The precipitate was removed by filtration and washed with DCM. The filtrate and washing were extracted with DCM and the organic phase was washed with water. The organic extract was dried over Na<sub>2</sub>SO<sub>4</sub>, filtered and evaporated to give a dark green solid. The crude product was purified by silica gel chromatography with MeOH/DCM=1/20 to afford **NIR-MA** as dark green solid. Yield: 25%. <sup>1</sup>H NMR (600 MHz, MeOD) δ 8.04 (d, J = 14.2 Hz, 2H), 7.43 – 7.37 (m, 4H), 7.27 (d, J = 8.0 Hz, 2H), 7.23 (t, J = 7.4 Hz, 2H), 6.99 (d, J = 8.7 Hz, 1H), 6.40 (dd, J = 8.7, 2.5 Hz, 1H), 6.33 (d, J = 2.4 Hz, 1H), 6.14 (d, J = 14.2 Hz, 2H), 4.02 (s, 3H), 3.61 (s, 6H), 2.75 (t, J = 5.9 Hz, 4H), 2.10 – 2.04 (br, 2H), 1.45 (s, 12H); <sup>13</sup>C NMR (151 MHz, MeOD) δ 177.15, 168.95, 154.65, 148.81, 148.03, 146.14, 145.98, 145.85, 143.98, 133.60, 129.88, 127.56, 127.44, 126.8, 120.56, 116.22, 112.68, 105.75, 105.58, 62.33, 53.65, 36.36, 35.00, 32.24, 29.09. ESI-MS: calcd for [M-I]<sup>+</sup> 586.3434, Found 586.3437.

## 2. Supplementary Spectra

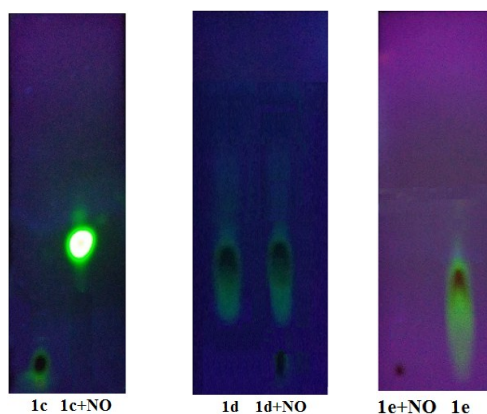

**Figure S1** TLC analysis of the reaction products of **1c**, **1d**, and **1e** with NO, obtained by bubbling excess NO gas to their THF solutions, respectively.

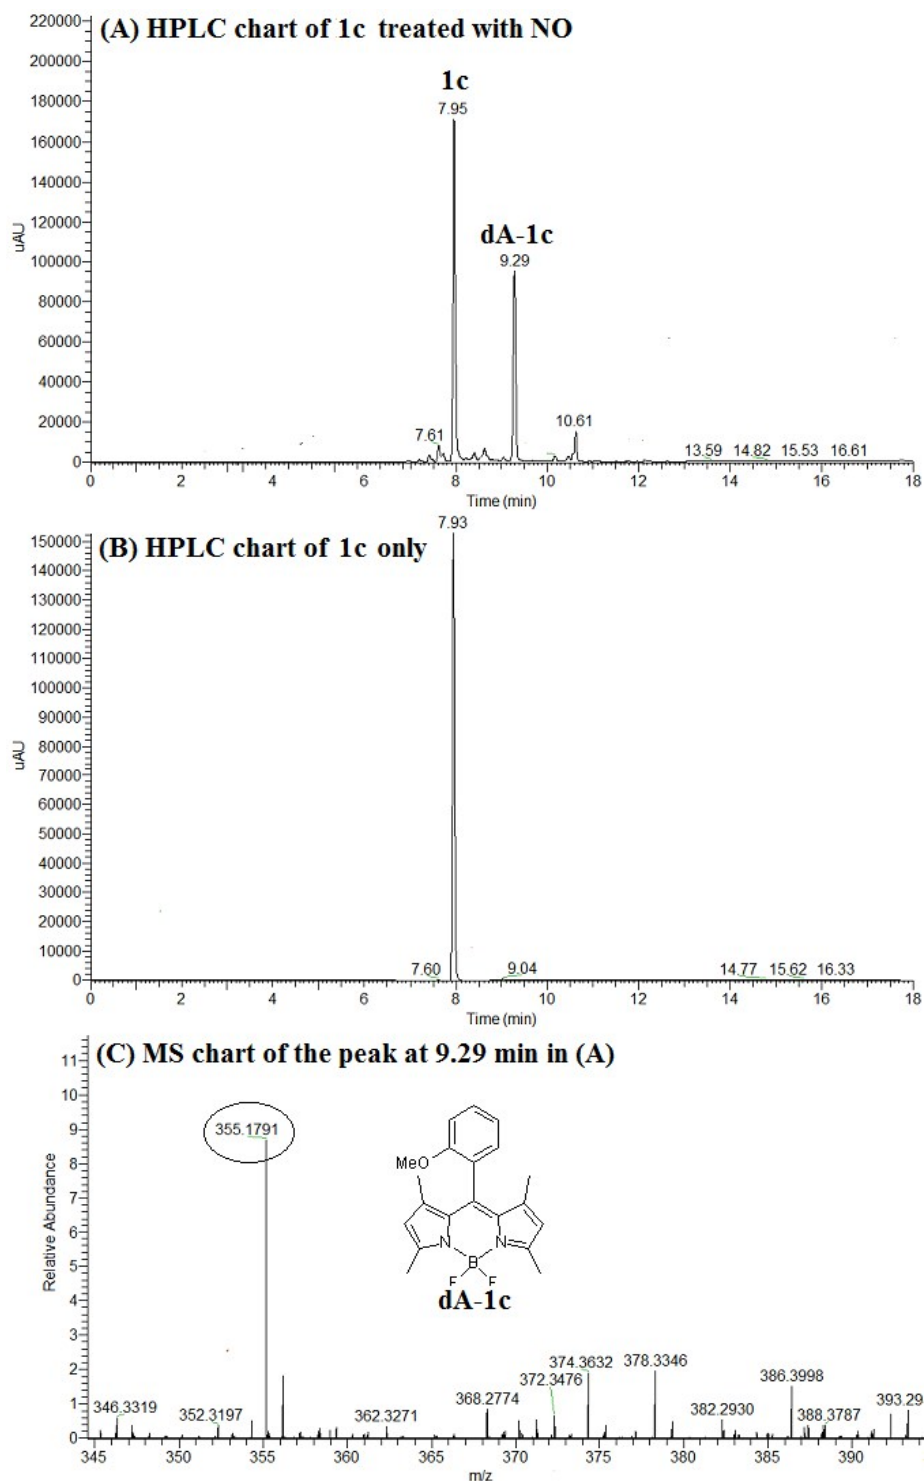

**Figure S2** HPLC-MS assay of **1c** treated with NO solution.

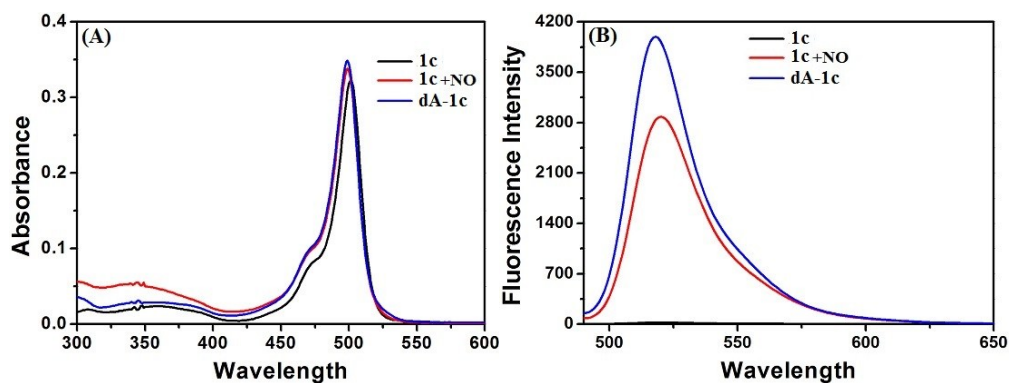

**Figure S3** The absorption (A) and fluorescence (B) spectra of **1c**, **1c** treated with NO, and **dA-1c**. Conditions: PBS buffer (50 mM, pH 7.4, containing 20% DMSO);  $\lambda_{\text{ex}} = 475 \text{ nm}$ ;  $\lambda_{\text{em}} = 519 \text{ nm}$ ; Slits: 5/5 nm; voltage: 650 V; T = 25 °C.

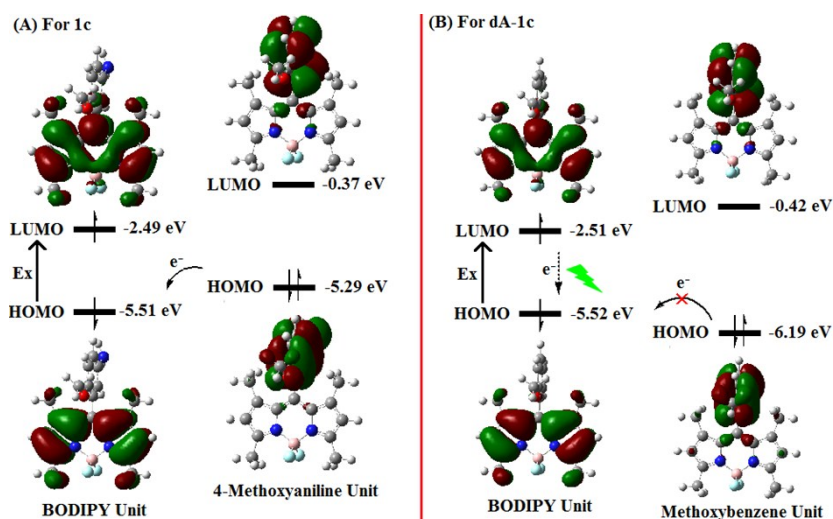

**Figure S4** (A) Frontier orbital energy representation of the PeT process in **1c**. (B) Frontier orbital energy representation of the PeT inhibition in **dA-1c**.



Note that: compound 1c and its deamination product dA-1c were named as “MA” and “dA-MA” afterward.

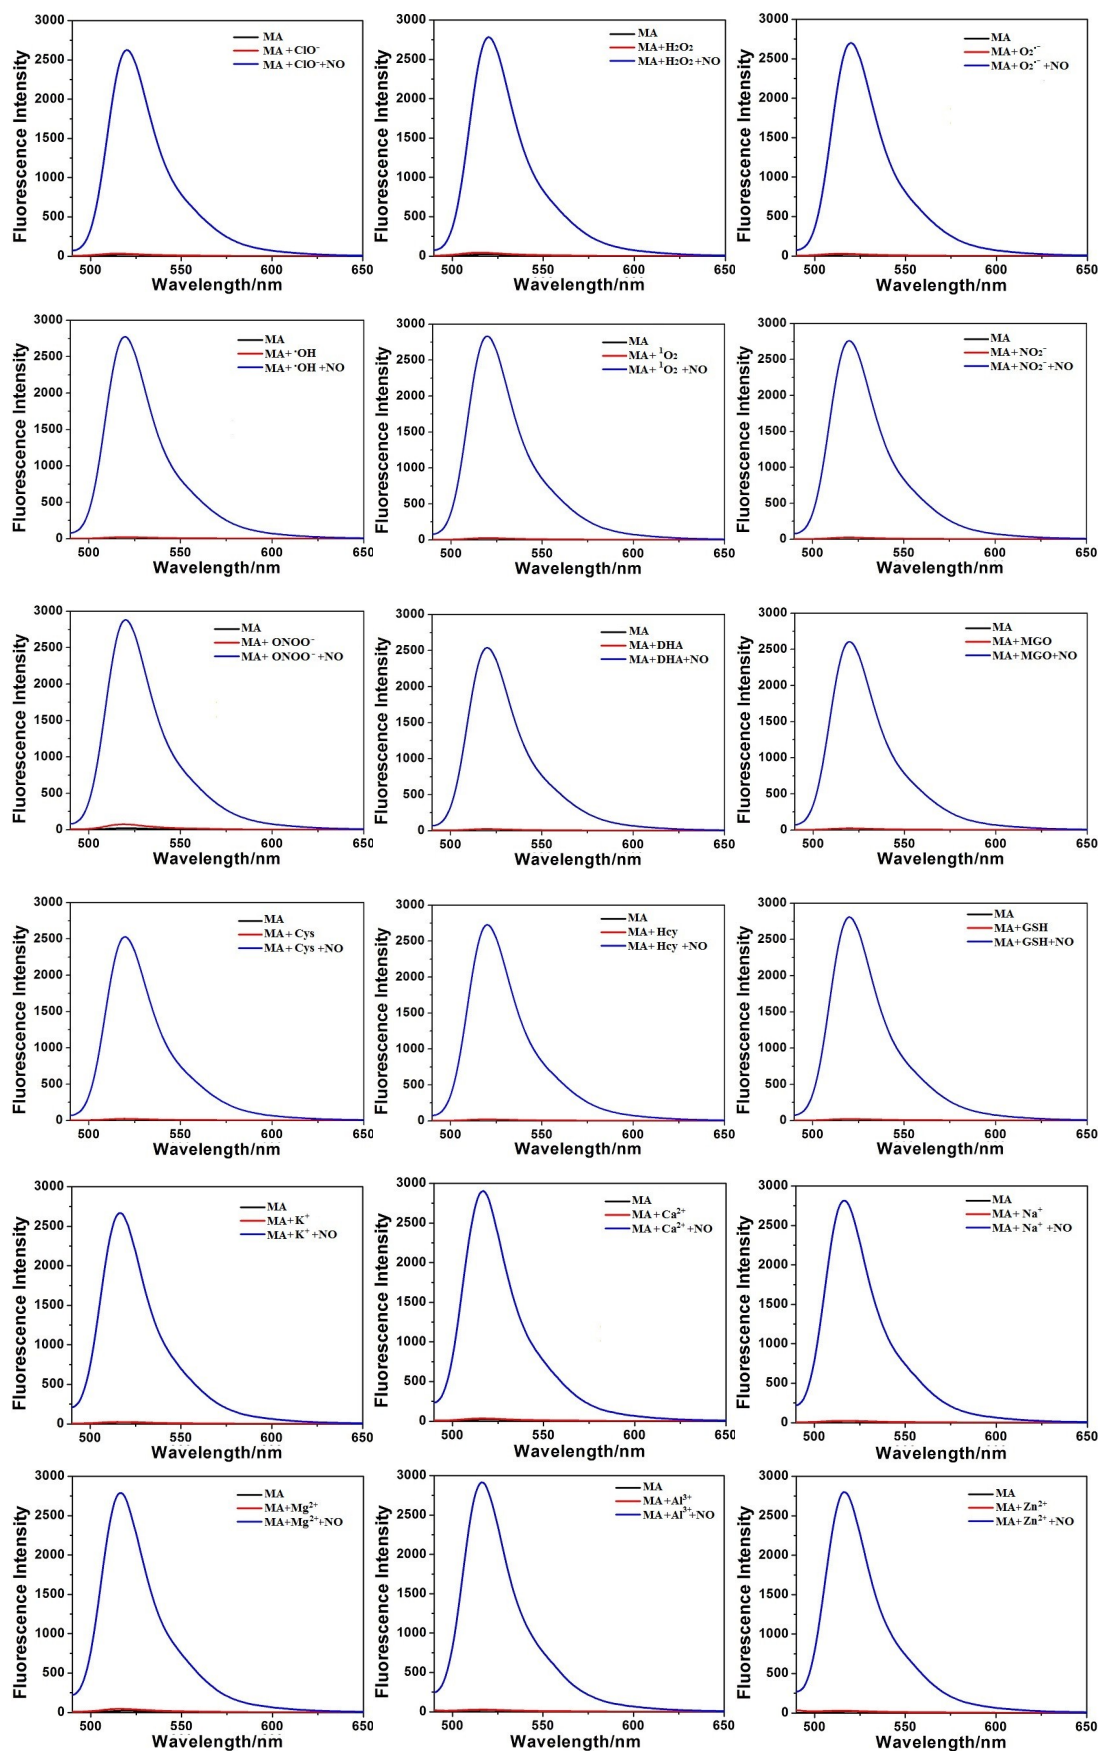

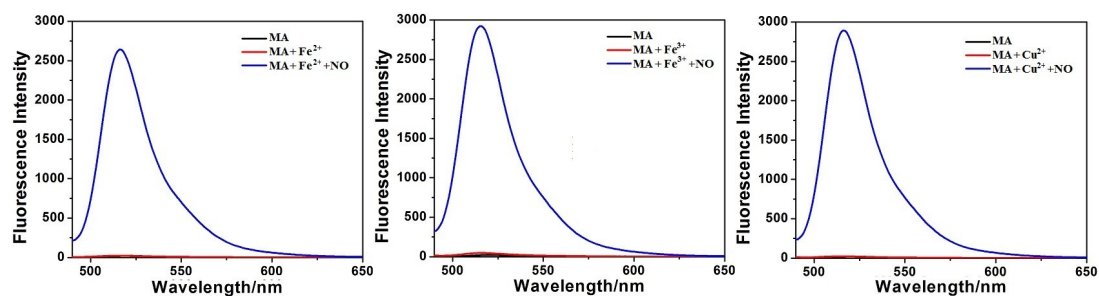

**Figure S5** Fluorescence spectra of MA (4  $\mu\text{M}$ ) treated with various ROS (40  $\mu\text{M}$ ), DHA/MGO (1 mM), Cys/Hcy (100  $\mu\text{M}$ ), GSH (1 mM), and various metal ions (100  $\mu\text{M}$ ) for 10 min, respectively, and then treated with NO (40  $\mu\text{M}$ ) for 10 min in PBS buffer (50 mM, pH 7.4, **containing 20% DMSO**).  $\lambda_{\text{ex}} = 475$  nm;  $\lambda_{\text{em}} = 519$  nm; Slits: 5/5 nm; voltage: 650 V; T = 25  $^{\circ}\text{C}$ .

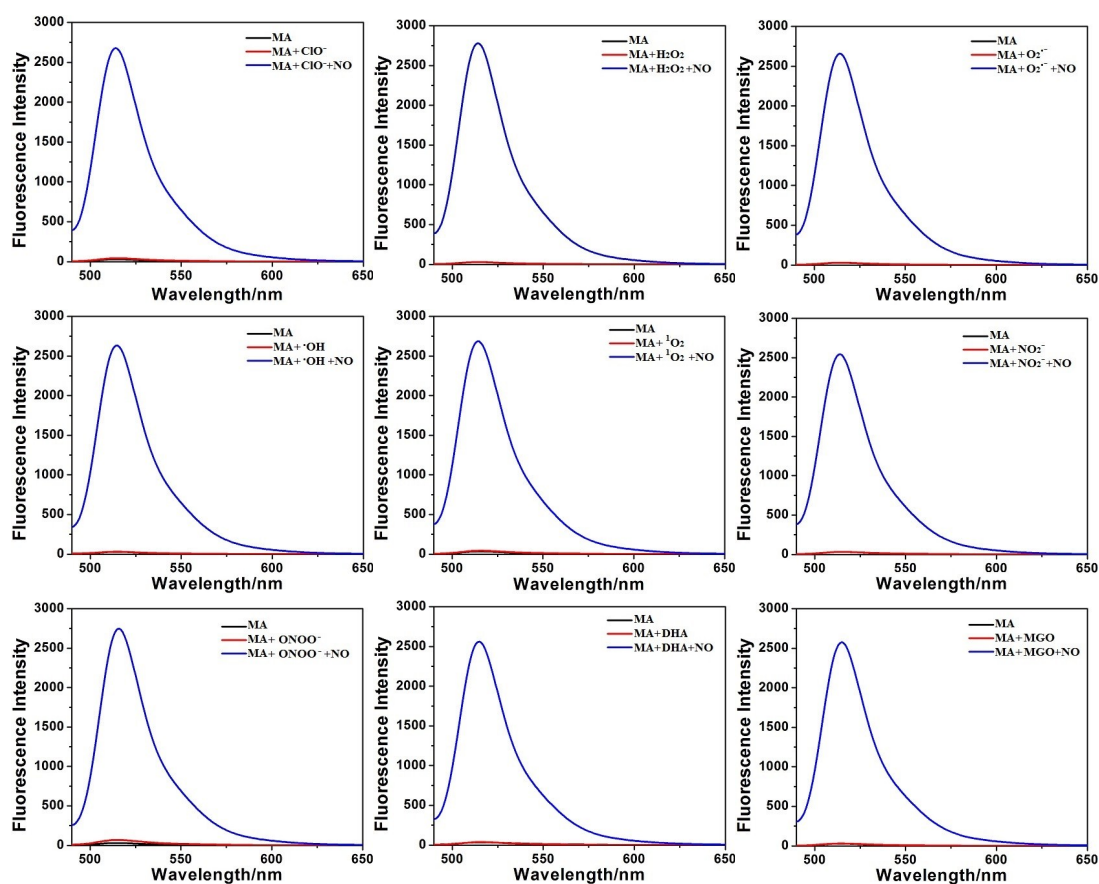

**Figure S6** Fluorescence spectra of MA (4  $\mu\text{M}$ ) treated with various ROS (40  $\mu\text{M}$ ) and DHA/MGO (1 mM) for 10 min, respectively, and then treated with NO (40  $\mu\text{M}$ ) for 10 min in PBS buffer (50 mM, pH 7.4, **containing 20% CH<sub>3</sub>CN**).  $\lambda_{\text{ex}} = 475$  nm;  $\lambda_{\text{em}} = 519$  nm; Slits: 5/5 nm; voltage: 650 V; T = 25  $^{\circ}\text{C}$ .

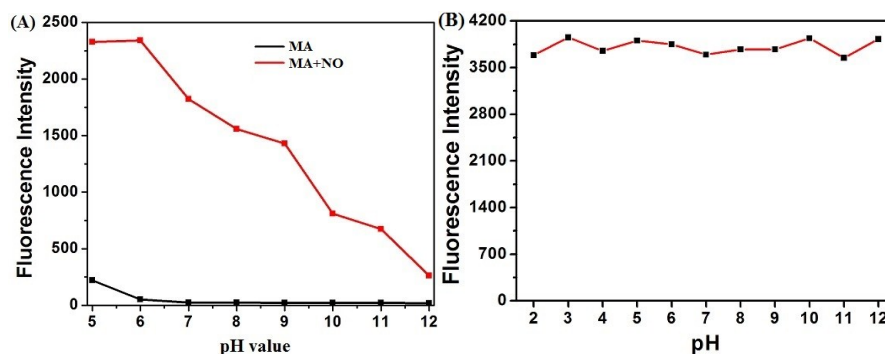

**Figure S7** (A) Fluorescence intensities of MA in the absence and presence of 10 equiv of NO at different pH values. Note that the decreased fluorescence intensities in the high pH values are possibly because the reactive species  $N_2O_3$  (nitrous anhydride), produced via the reaction of NO with  $O_2$ , can easily be converted to  $NO_2^-$  in the basic condition, and thus loses its reactivity with MA. (B) Fluorescence intensities of dA-MA at different pH values.

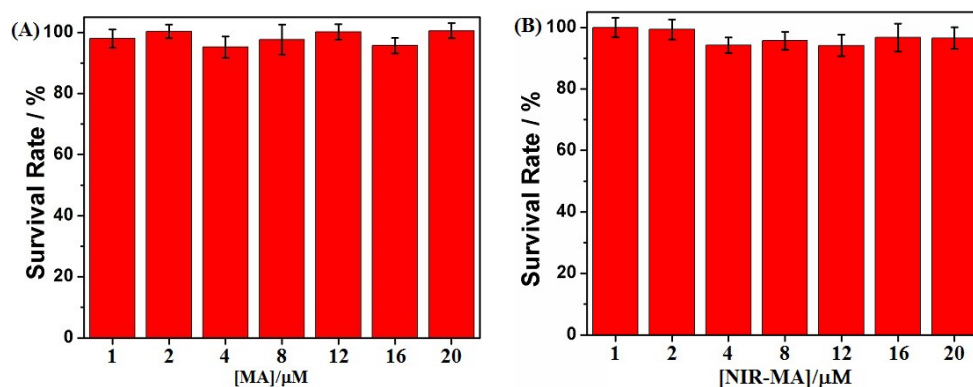

**Figure S8** Percentage of viable HeLa cells after treated with increasing concentrations of MA (A) or NIR-MA (B) for 24 hours.

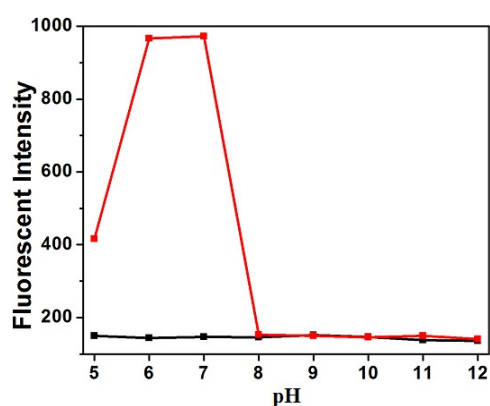

**Figure S9** Fluorescence intensities of NIR-MA in the absence and presence of 10 equiv of NO at different pH values.

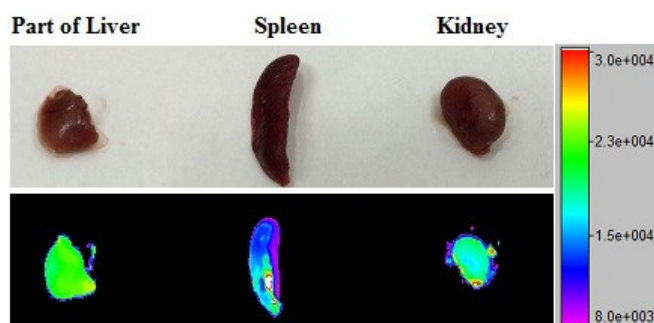

**Figure S10** The brightfield images (above) and fluorescence images (below) of the dissected organs from the abdominal region of an inflamed mouse model treated with NIR-MA. The mouse was first i.p. injected with LPS (1 mg/ml, 100  $\mu$ L) for 24 h, and then i.p. injected with NIR-MA (100  $\mu$ L, 10  $\mu$ M) for 30 min. Images were obtained by Bruker In-Vivo FX Pro small animal optical imaging system with an excitation filter 720 nm and an emission filter 790 nm.

### 3. <sup>1</sup>H NMR, <sup>13</sup>C NMR and HRMS Charts

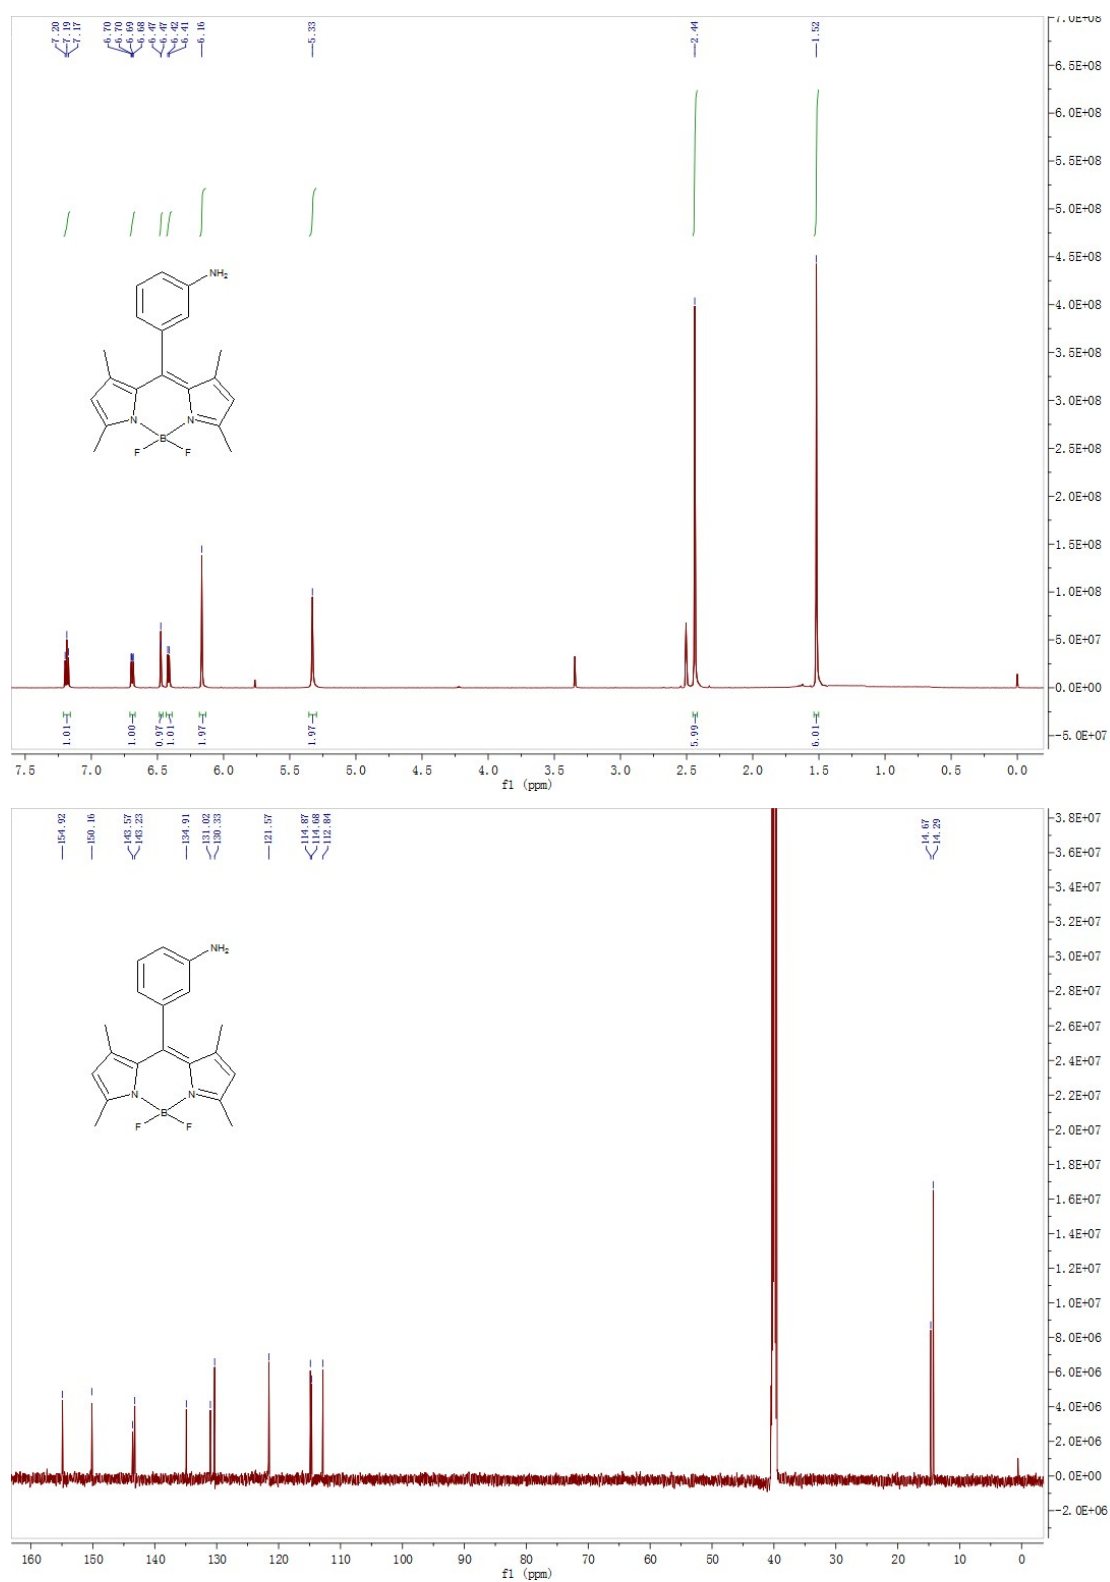

**Figure S11.** <sup>1</sup>H NMR and <sup>13</sup>C NMR charts of **1a** (DMSO-*d*<sub>6</sub>, 600 MHz).

H1 #11-29 RT: 0.11-0.29 AV: 19 NL: 5.25E8  
T: FTMS + p ESIFull ms [150.00-1000.00]

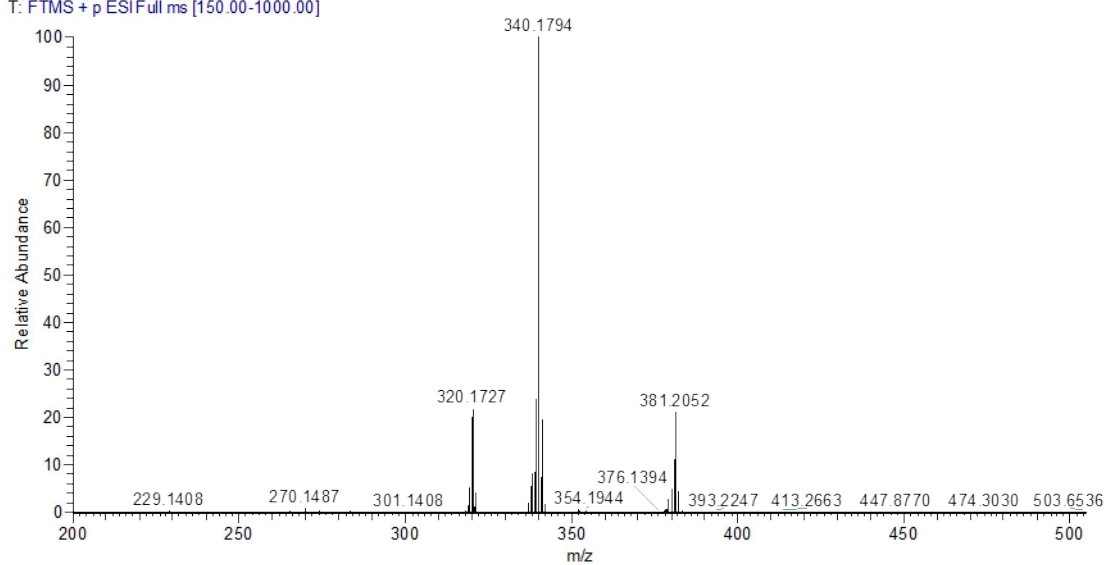

**Figure S12.** HRMS chart of compound **1a**.

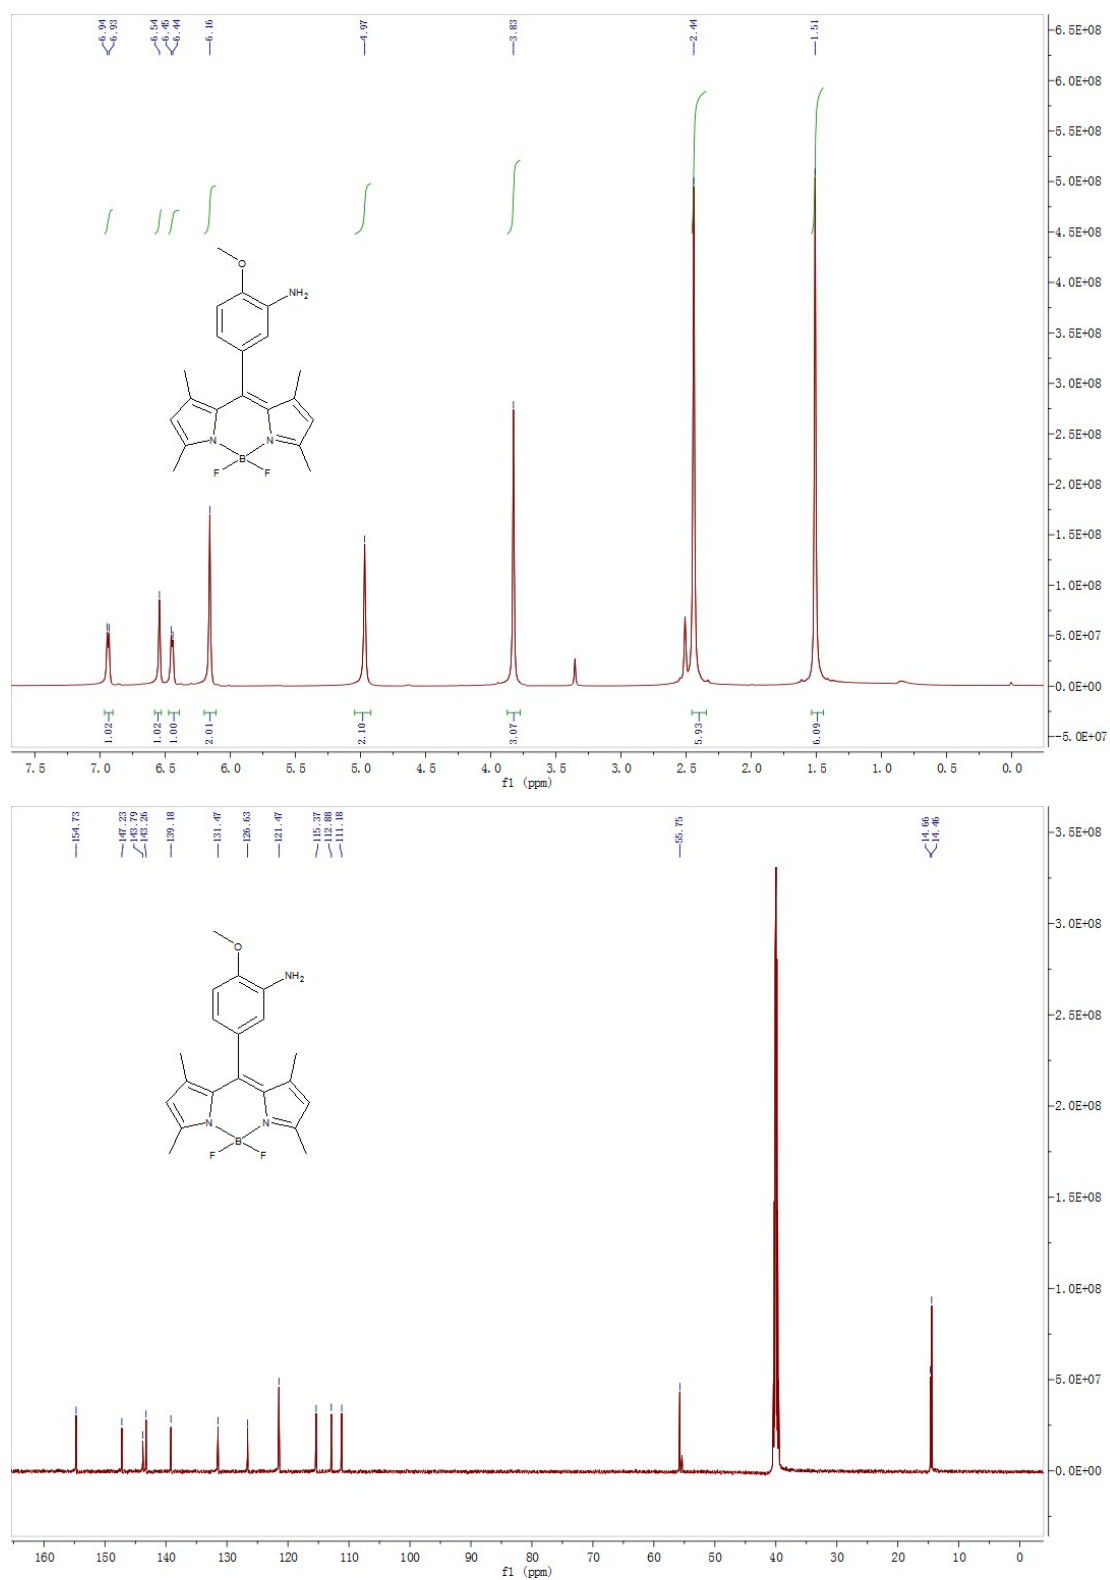

**Figure S13.** <sup>1</sup>H NMR and <sup>13</sup>C NMR charts of **1b** (DMSO-*d*<sub>6</sub>, 600 MHz).

H2 #12-28 RT: 0.14-0.28 AV: 8 NL: 3.19E8  
T: FTMS + p ESI Full ms [150.00-1000.00]

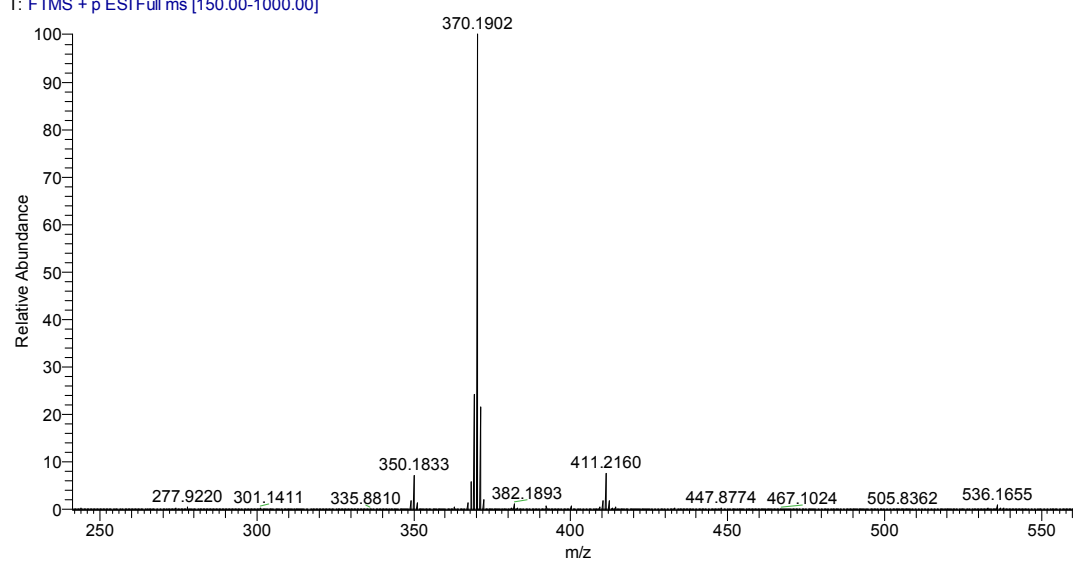

**Figure S14.** HRMS chart of compound **1b**.



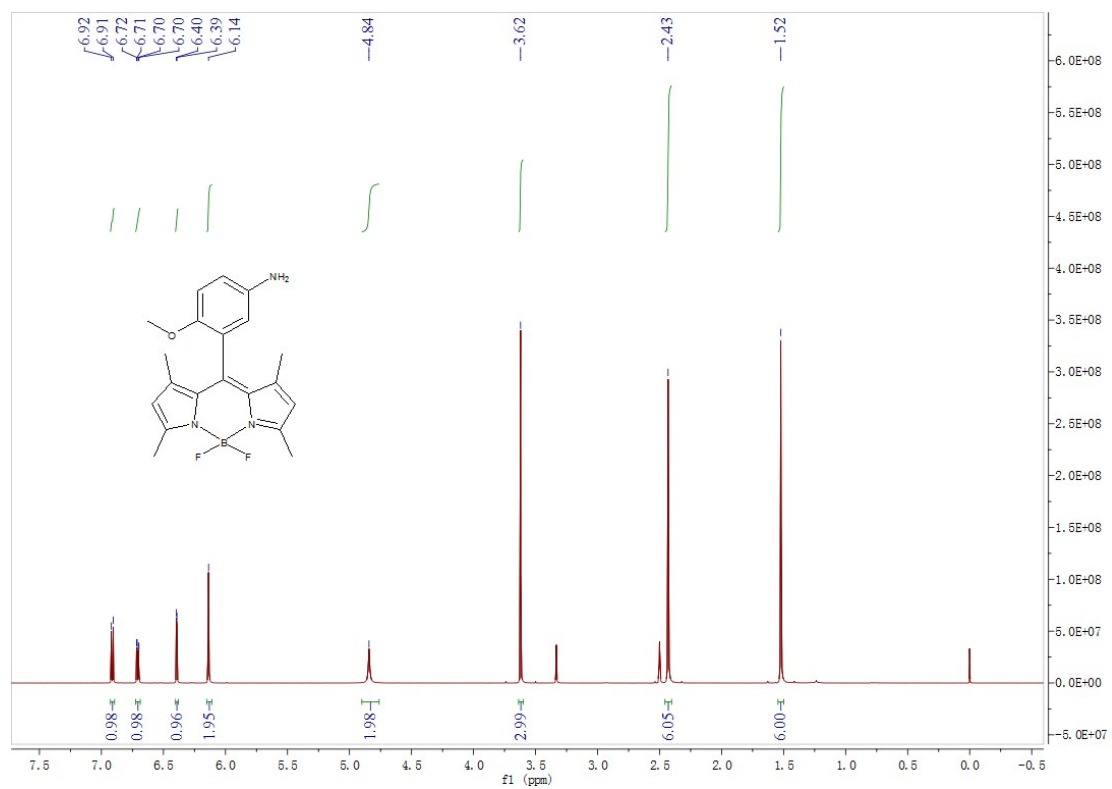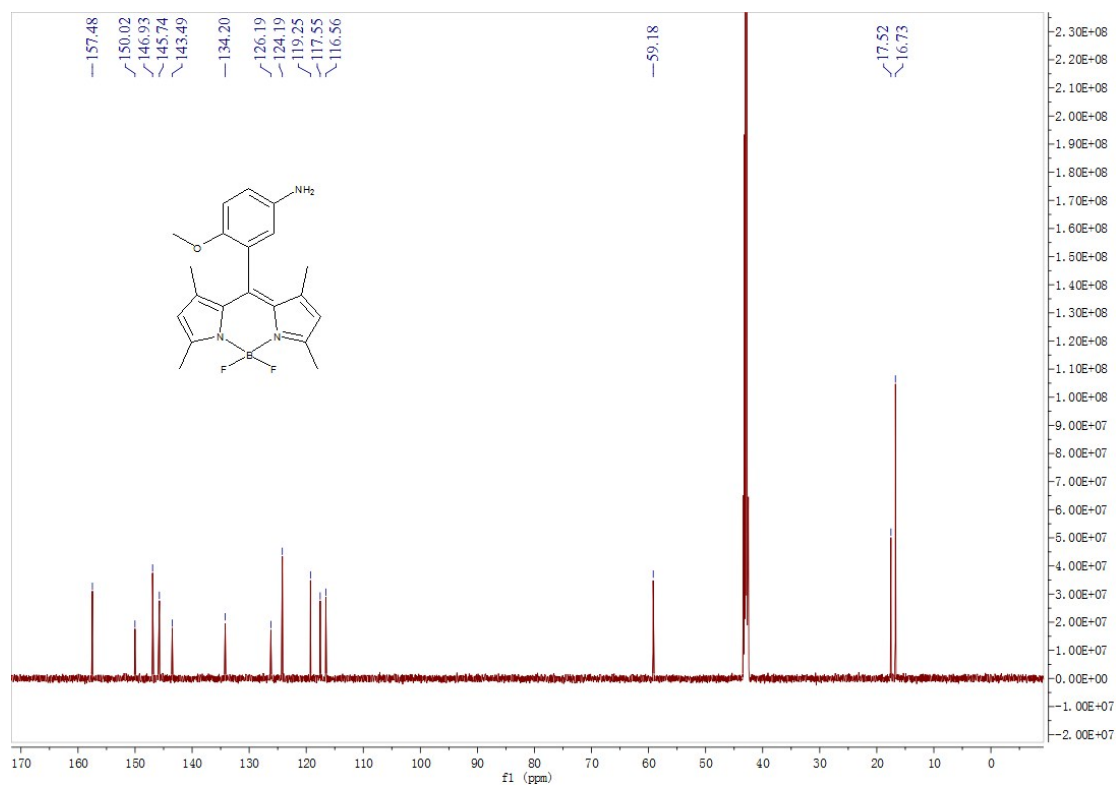

**Figure S15.**  $^1\text{H}$  NMR and  $^{13}\text{C}$  NMR charts of **1c** (MA) ( $\text{DMSO-}d_6$ , 600 MHz).

BOMN#1756-1828 RT: 7.82-8.05 AV: 13 NL: 2.27E8  
T: FTMS - p ESI Full ms [150.00-1500.00]

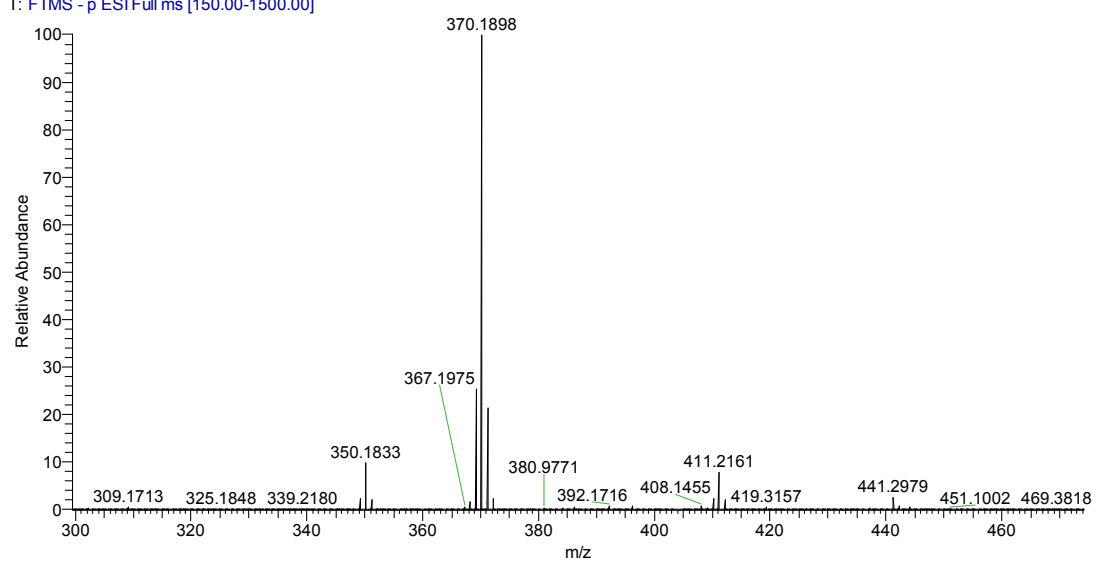

**Figure S16.** HRMS chart of **1c (MA)**.

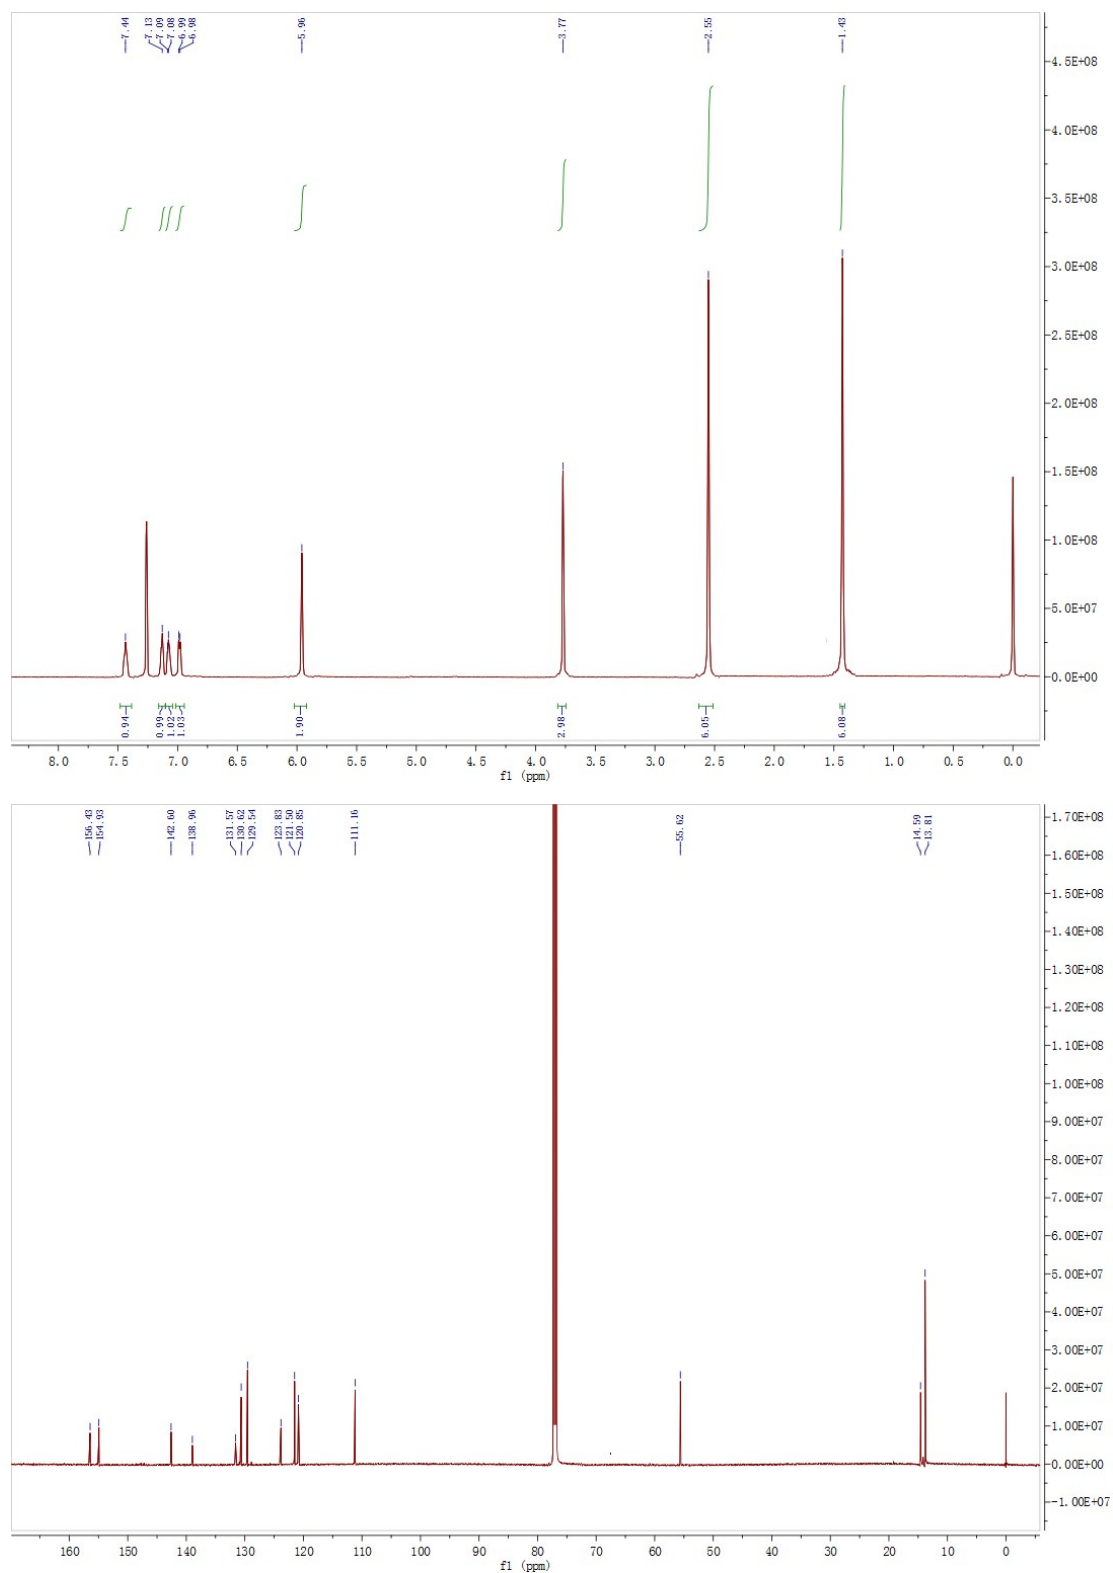

Figure S17. <sup>1</sup>H NMR and <sup>13</sup>C NMR charts of dA-1c (dA-MA) (DMSO-d<sub>6</sub>, 600 MHz).

HUO #25-26 RT: 0.26-0.27 AV: 2 NL: 6.66E6  
T: FTMS + p ESI Full ms [150.00-1000.00]

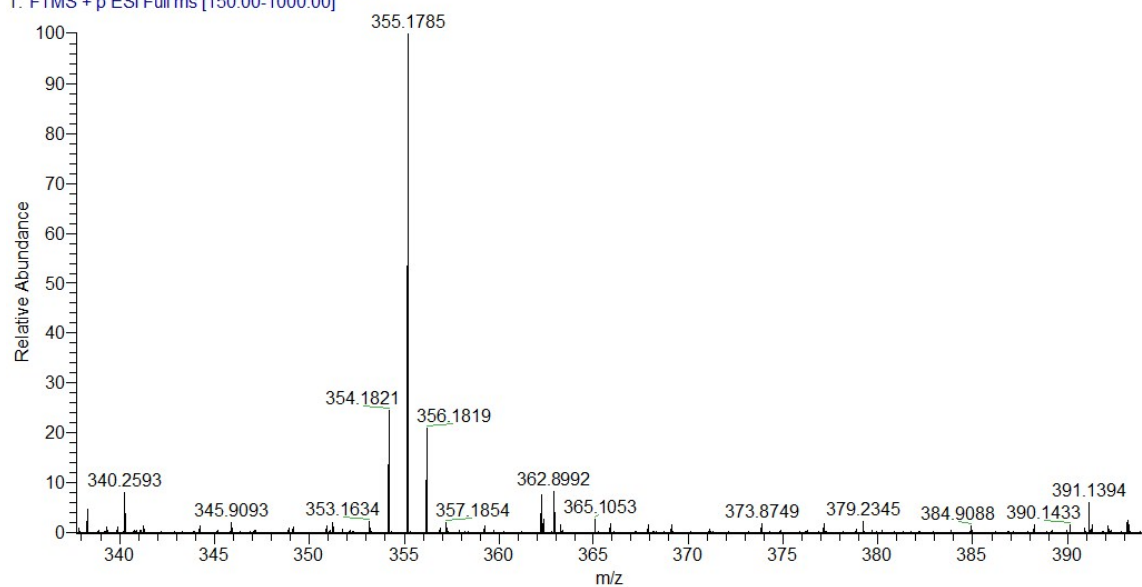

**Figure S18.** HRMS chart of **dA-1c (dA-MA)**.

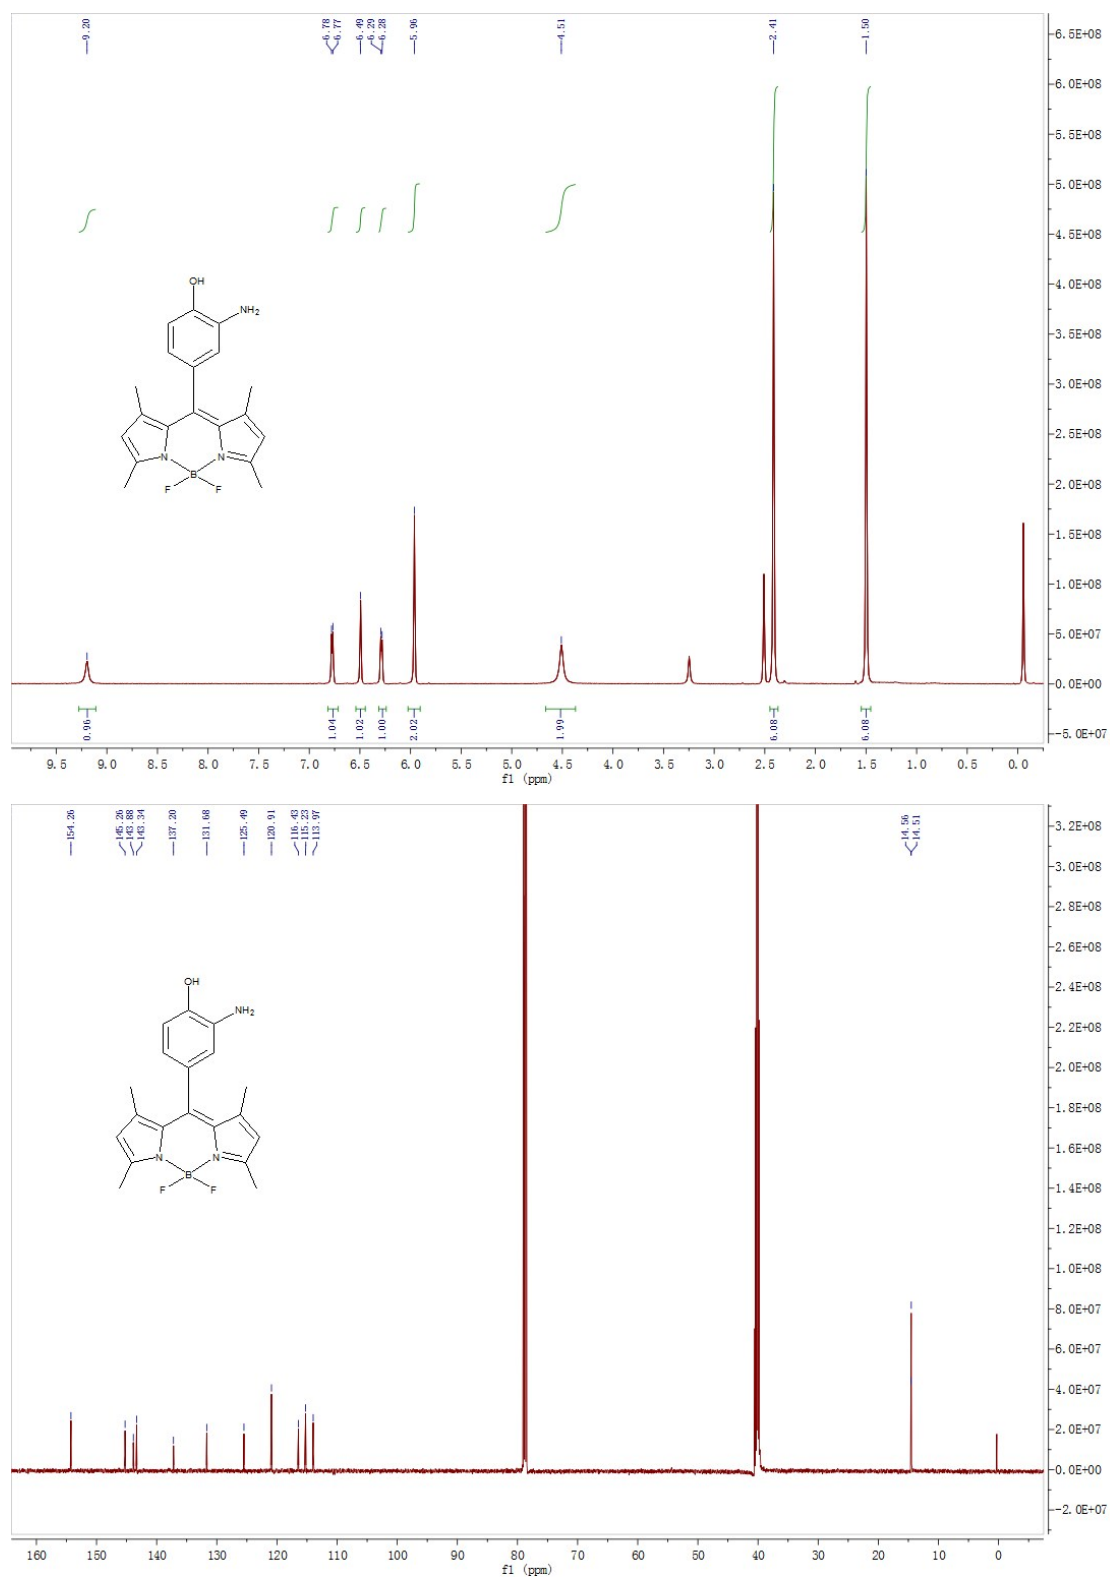

**Figure S19.** <sup>1</sup>H NMR and <sup>13</sup>C NMR charts of **1d** (DMSO-*d*<sub>6</sub>, 600 MHz).

H3 #15 RT: 0.16 AV: 1 NL: 1.43E9  
T: FTMS + p ESIFull ms [150.00-1000.00]

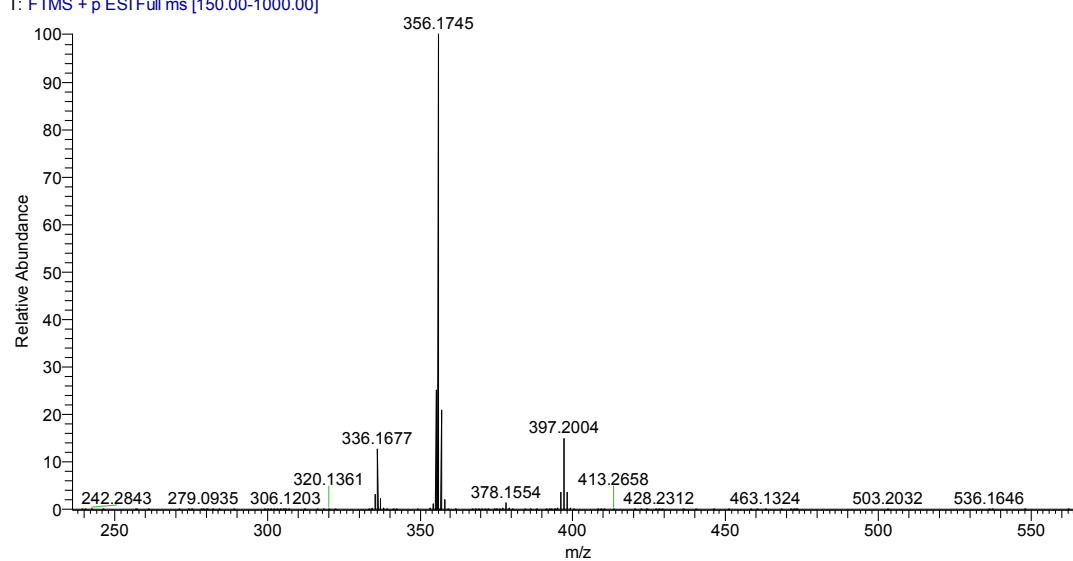

**Figure S20.** HRMS chart of **1d**.

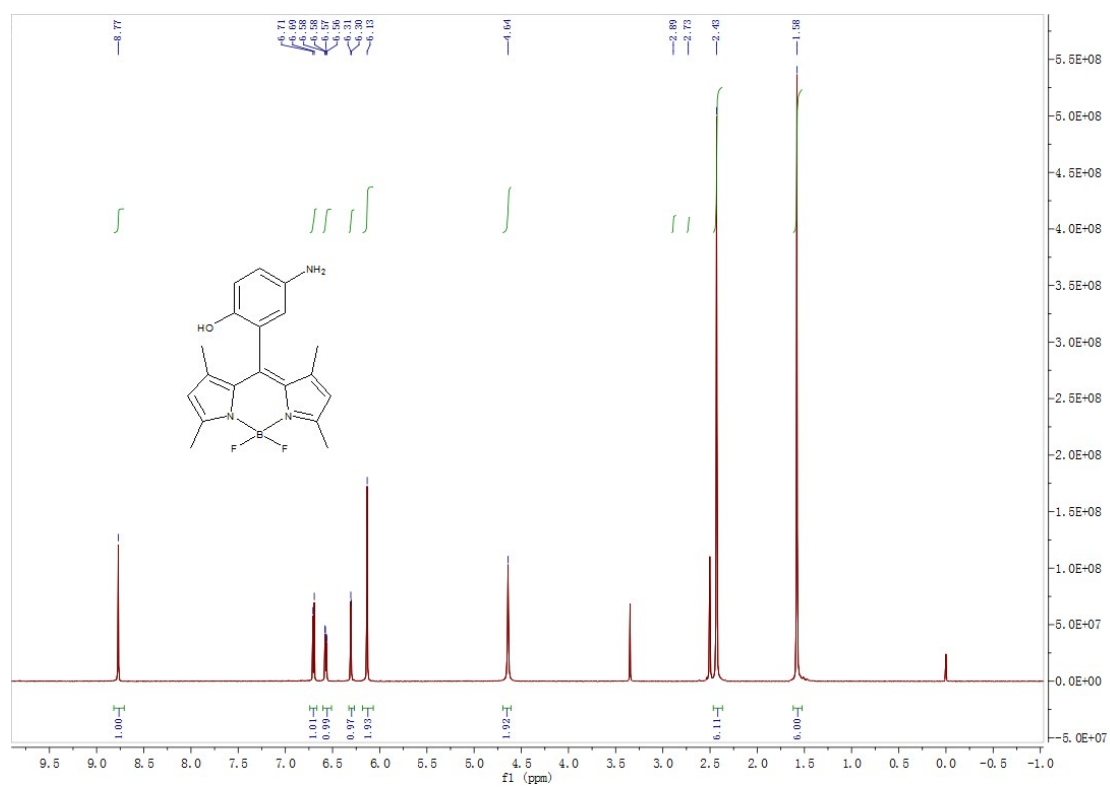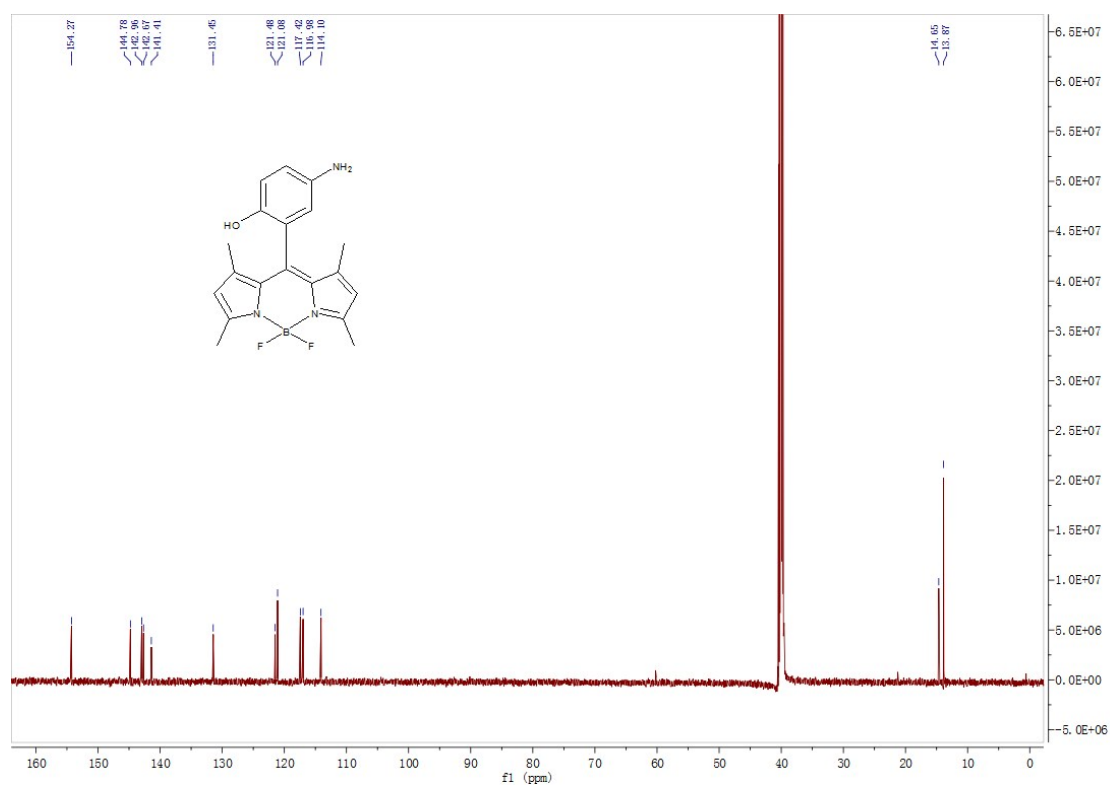

**Figure S21.** <sup>1</sup>H NMR and <sup>13</sup>C NMR charts of **1e** (DMSO-*d*<sub>6</sub>, 600 MHz).

H4 #17 RT: 0.18 AV: 1 NL: 5.08E8  
T: FTMS + p ESIFull ms [150.00-1000.00]

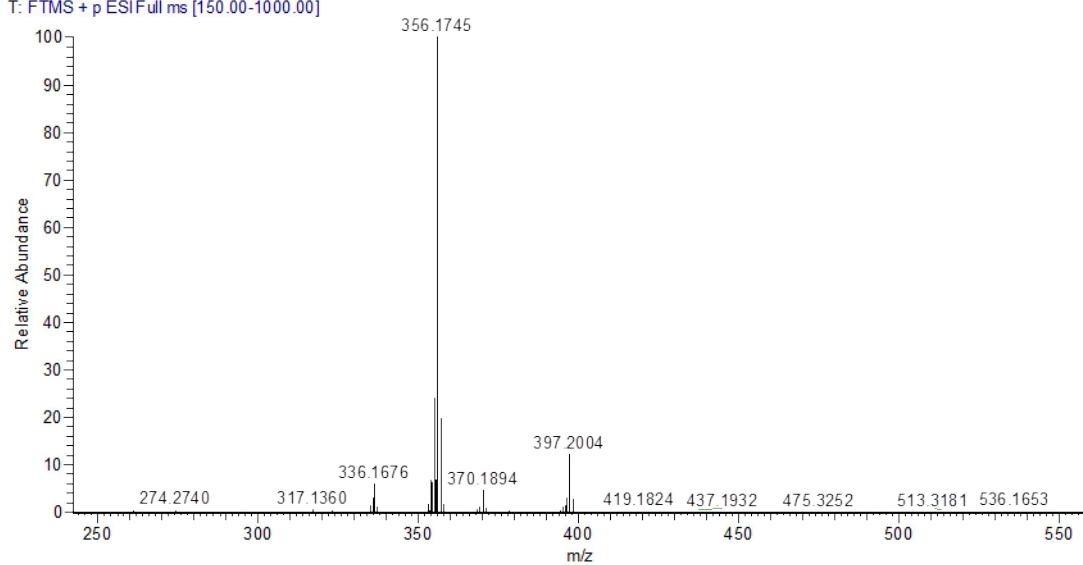

**Figure S22.** HRMS chart of **1e**.



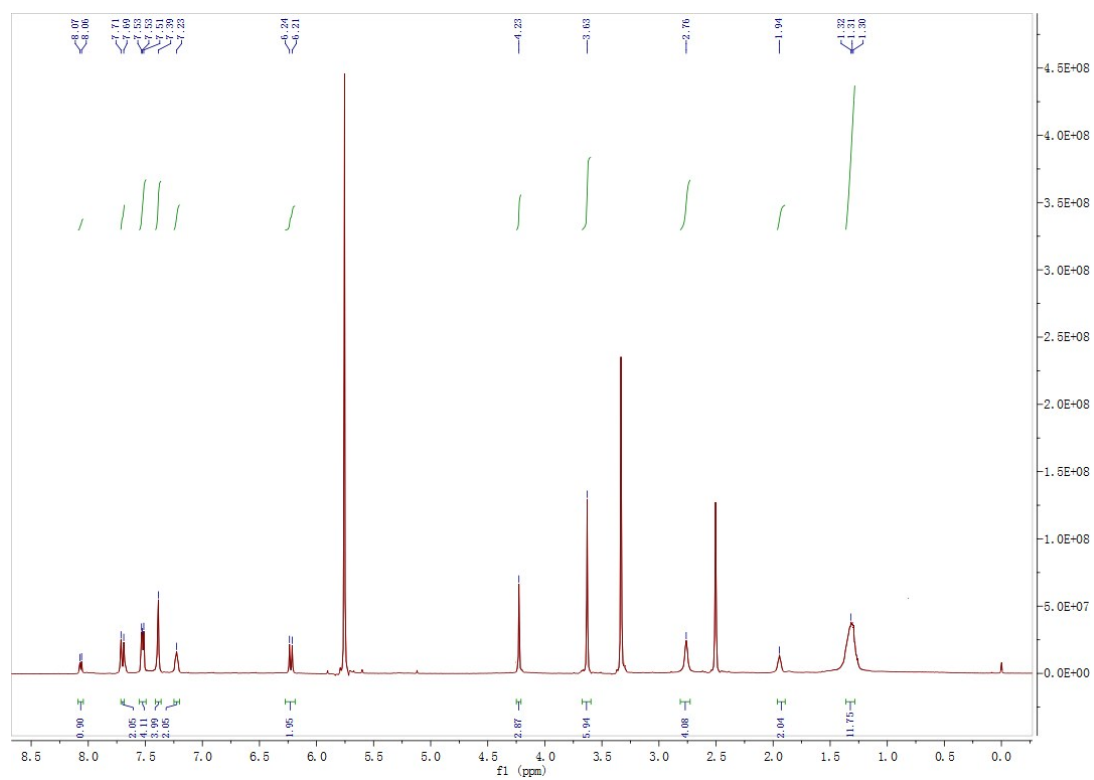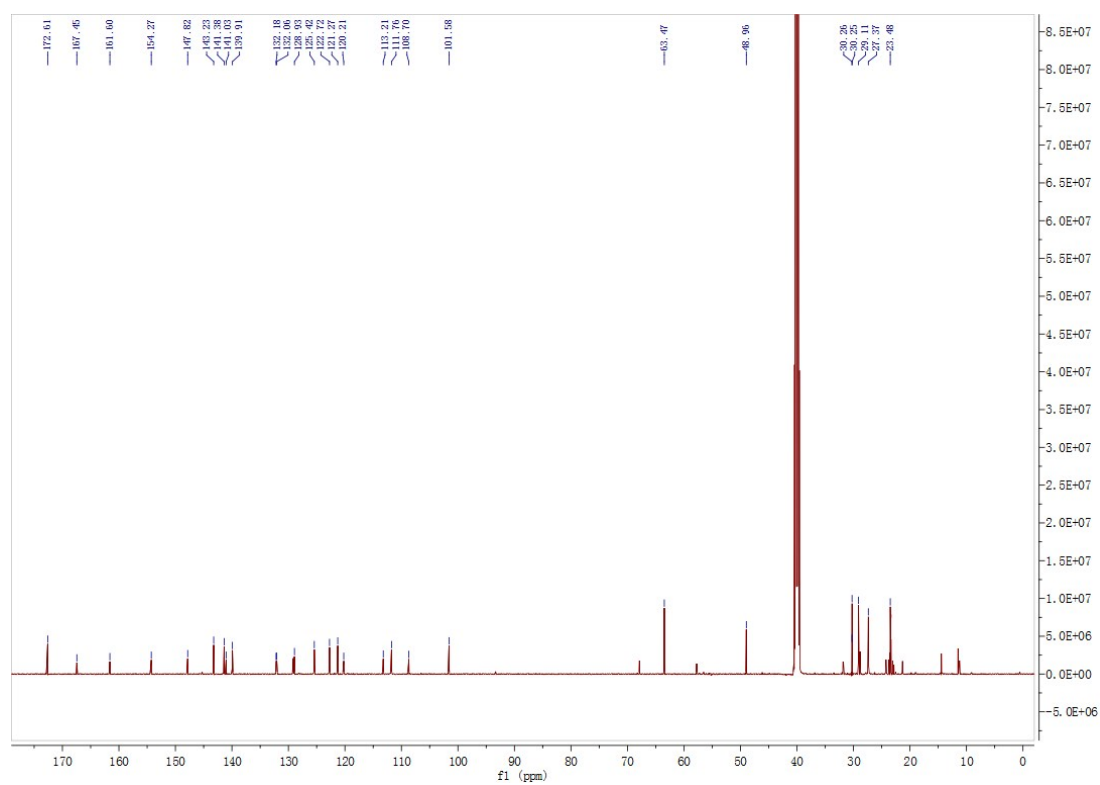

**Figure S23.** <sup>1</sup>H NMR and <sup>13</sup>C NMR charts of intermediate **4** (DMSO-*d*<sub>6</sub>, 600 MHz).

HYY-W2 #15-63 RT: 0.14-0.60 AV: 49 NL: 9.92E7  
T: FTMS + p ESI Full ms [50.00-750.00]

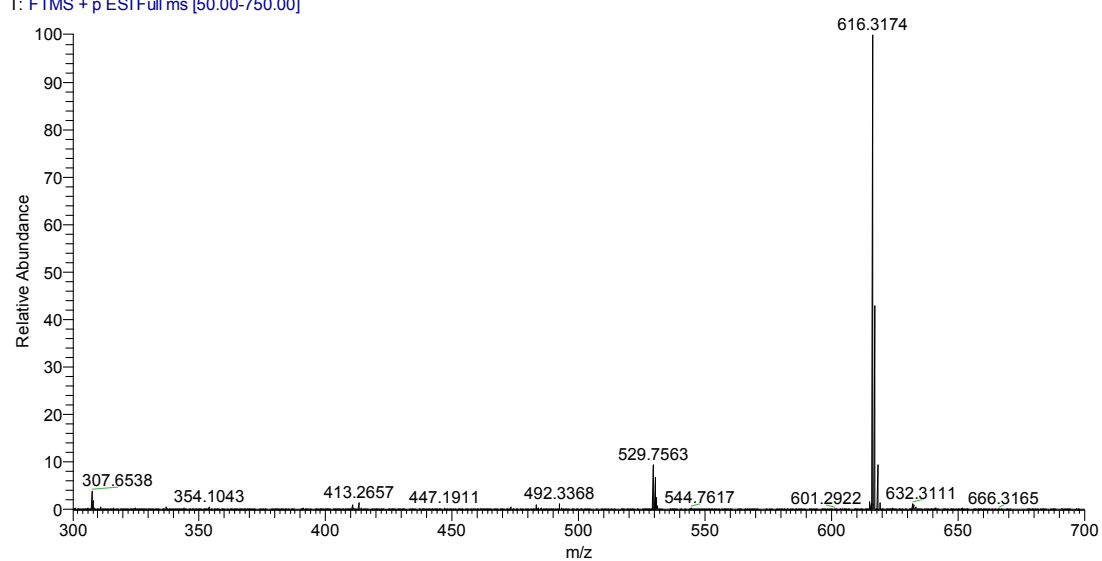

**Figure S24.** HRMS chart of intermediate 4.

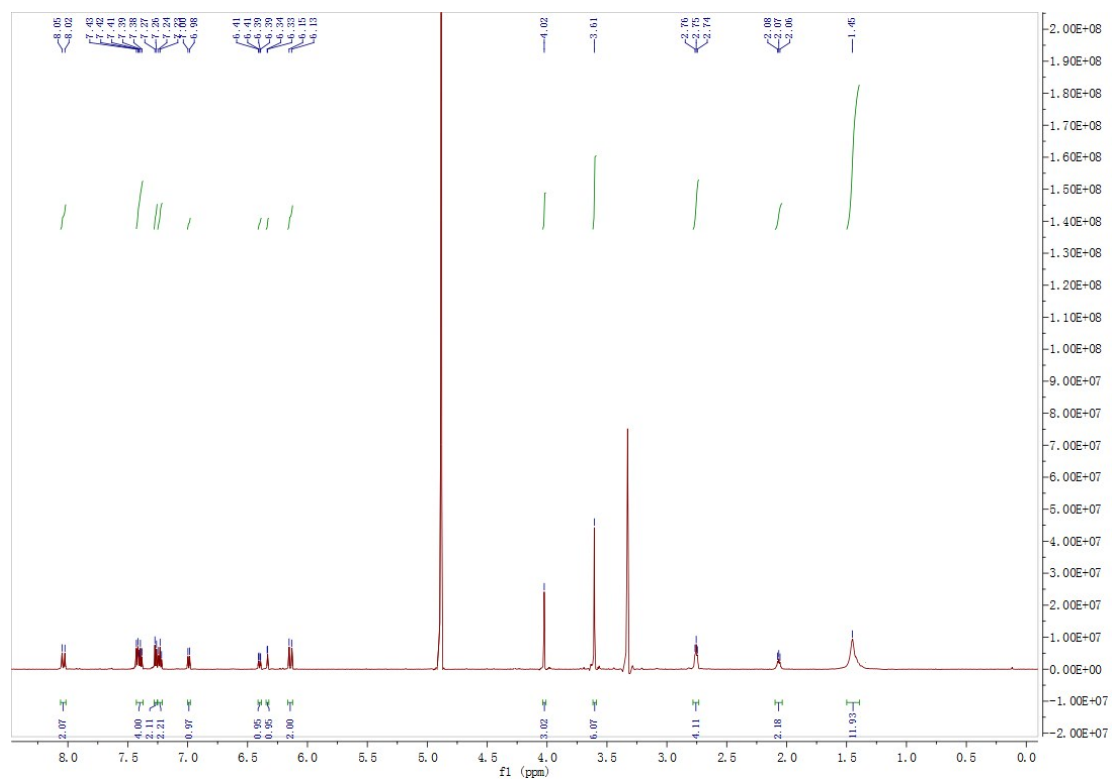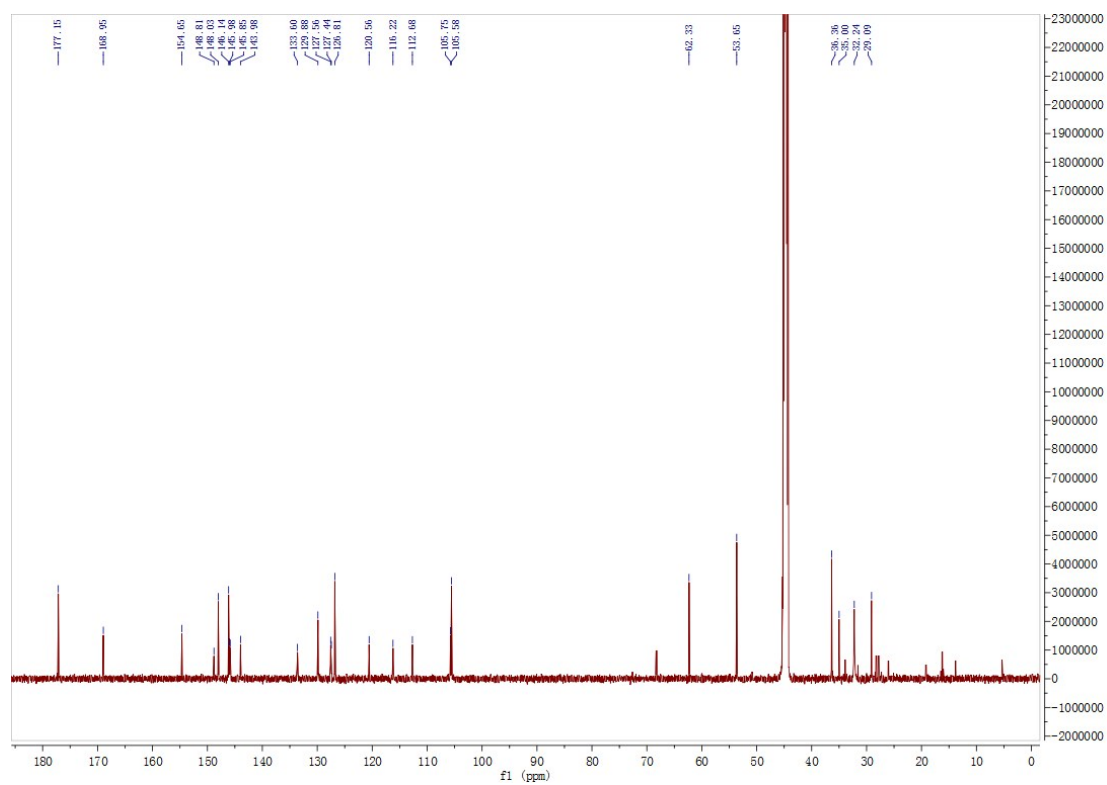

**Figure S25.** <sup>1</sup>H NMR and <sup>13</sup>C NMR charts of NIR-MA (DMSO-*d*<sub>6</sub>, 600 MHz).

HYY-W1 #13-34 RT: 0.12-0.32 AV: 22 NL: 2.25E8  
T: FTMS + p ESIFull ms [50.00-750.00]

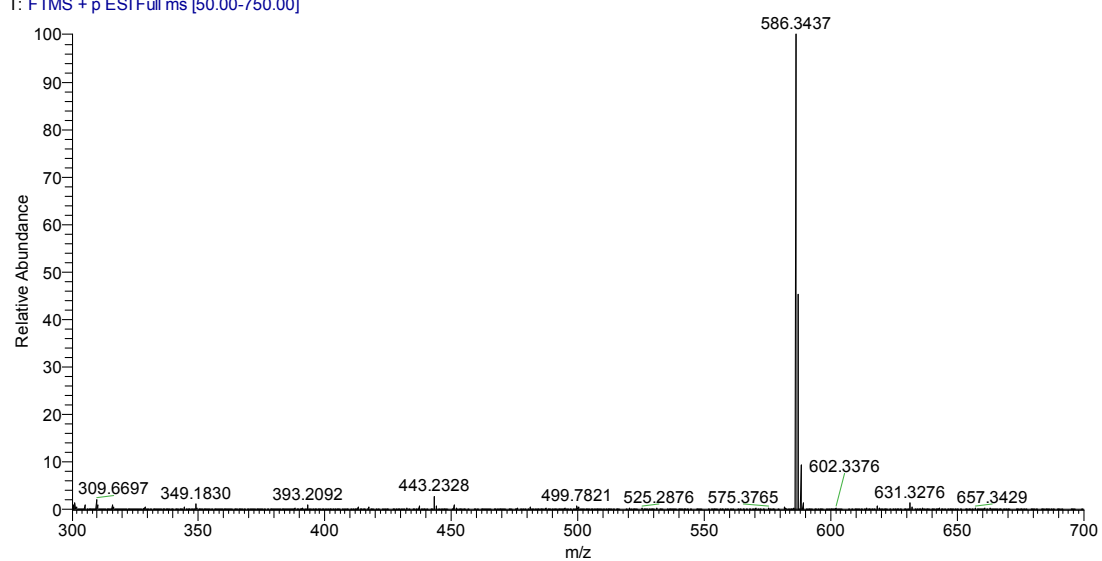

**Figure S26.** HRMS chart of NIR-MA.

#### 4. Reference

1. J. Miao, Y. Huo, X. Lv, Z. Li, H. Cao, H. Shi, Y. Shi, W. Guo, *Biomaterials*, **2016**, 78, 11–19.
